# Supplementary material for: Prognostic histologic subtyping of dominant tumor in resected synchronous multiple adenocarcinomas of lung
Source: PubMed Central journal article supplement (PMC8100294; doi:10.1038/s41598-021-88193-9), 2021-05-05

Intermediate grade of DT

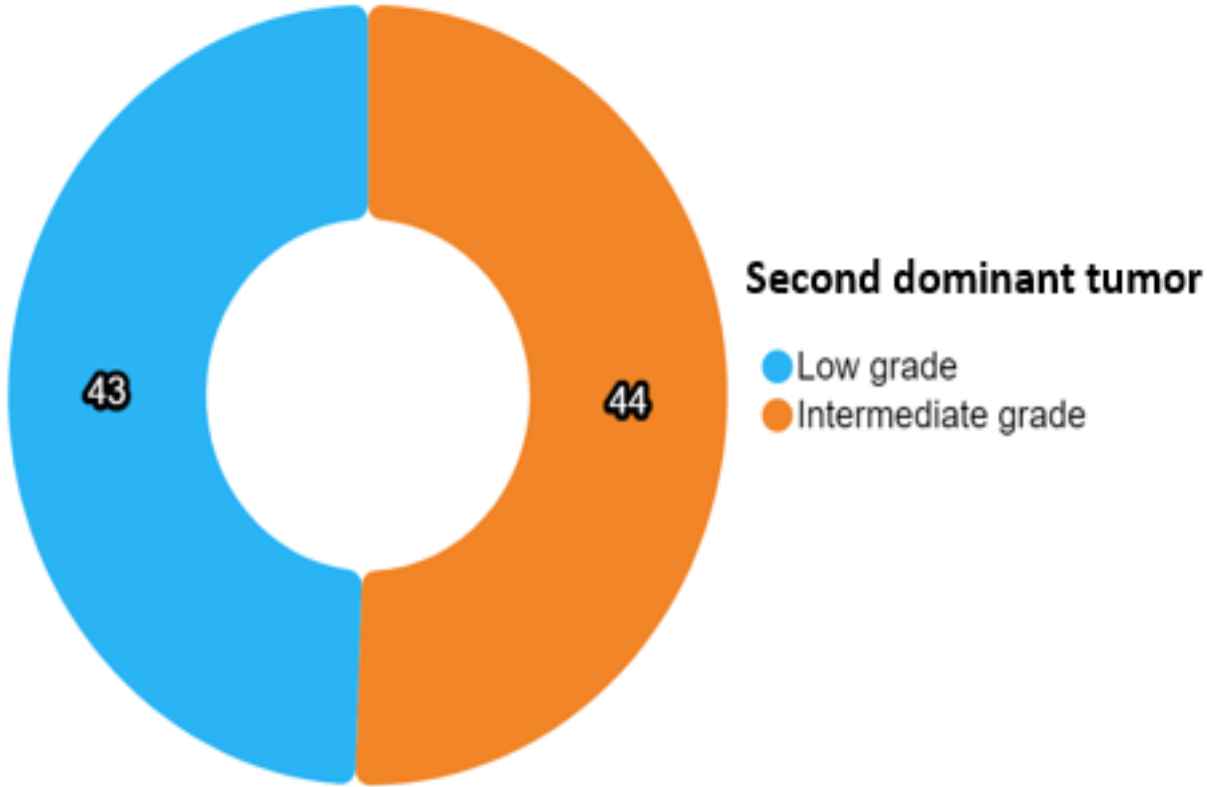

High grade of DT

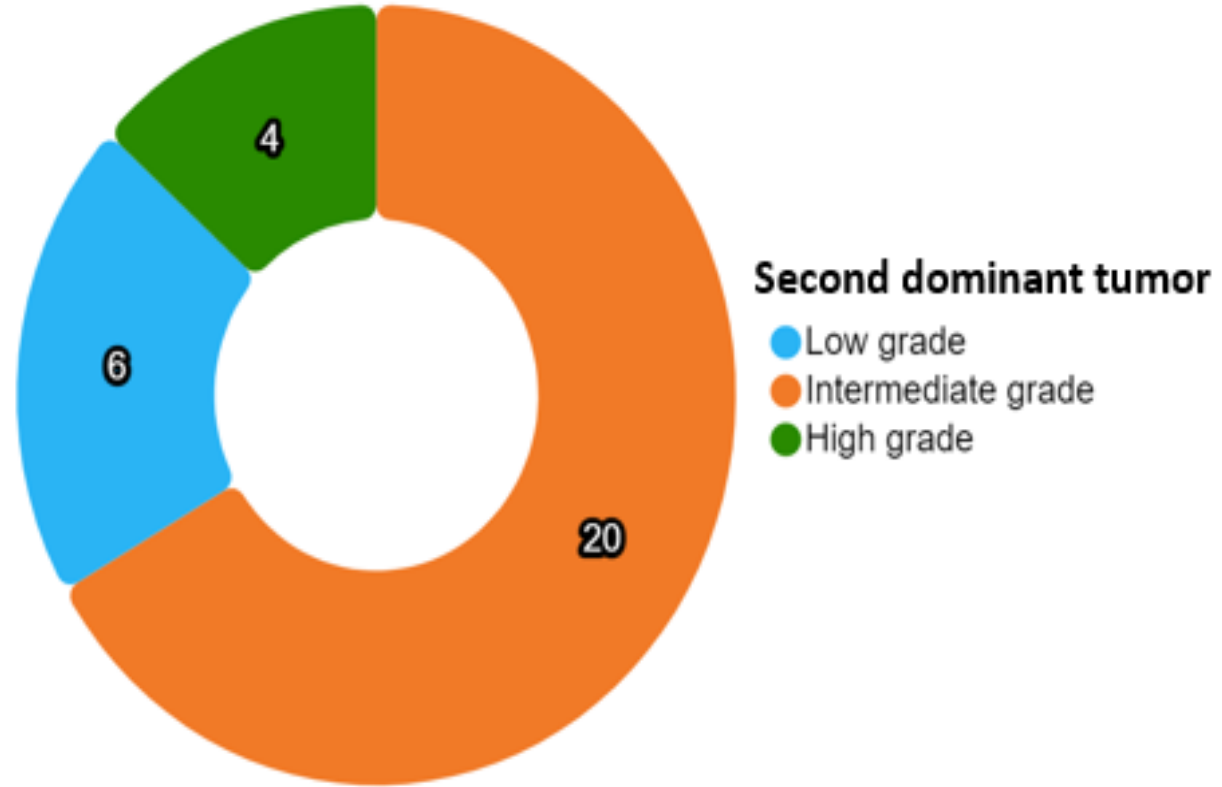

Supplement: 41598_2021_88193_MOESM2_ESM.pdf [file 41598_2021_88193_MOESM2_ESM.pdf]
